# Supplementary material
Source: Springer Nature journal article supplement (https://www.springermedizin.de/resource/supplementary/12936_2008_838_MOESM2_ESM.pdf/9549056)

A

## Pfmdr N86Y - CQ - D14

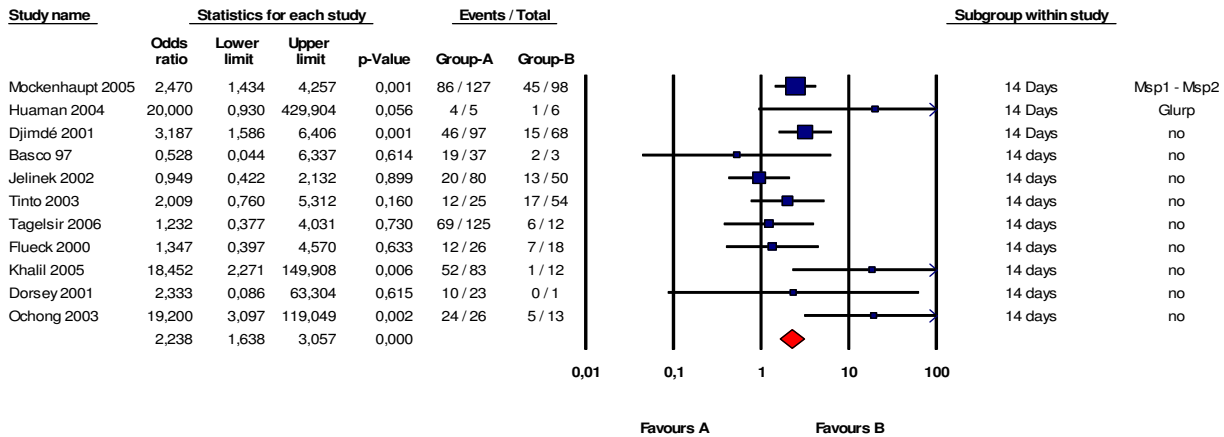

## Meta Analysis

B

## Pfmdr N86Y - CQ - D28

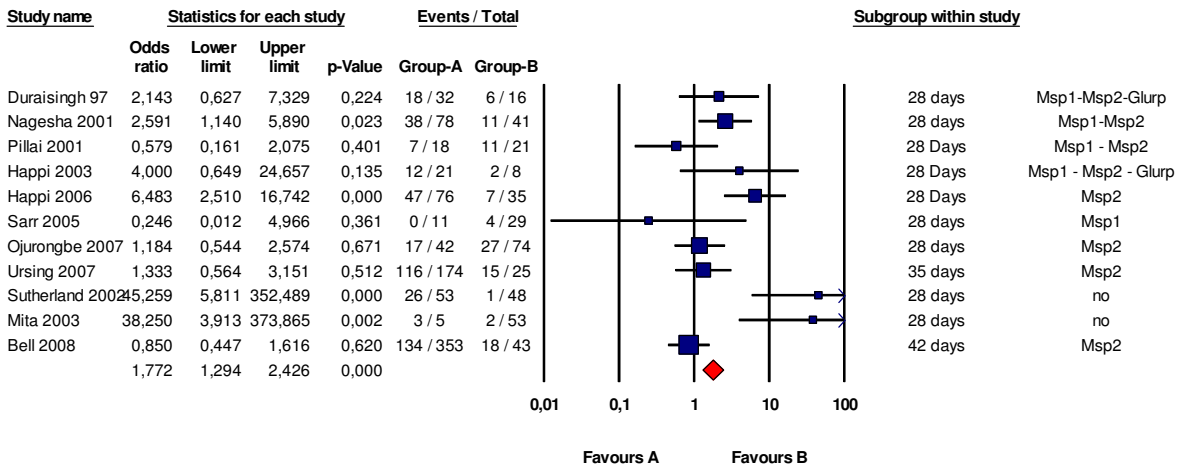

## Meta Analysis

Supplement: MOESM2 [file 9549056]
